# Supplementary material for: Direct mercury determination in blood and urine by means of high-resolution continuum source graphite furnace atomic absorption spectrometry using gold nanoparticles as a chemical modifier
Source: Royal Society of Chemistry journal article supplement (doi:10.1039/c7ja00323d), 2017-01-01
Supplement: c7ja00323d1.pdf [file c7ja00323d1.pdf]

## Electronic Supplementary Information (ESI)

**Direct mercury determination in blood and urine by means of high resolution-continuum source graphite furnace atomic absorption spectrometry using gold nanoparticles as chemical modifier**

Maite Aramendía,<sup>\*a,c</sup> Ananda Guarda,<sup>b</sup> Diego Leite,<sup>c</sup> Martín Resano<sup>\*c</sup>

<sup>a</sup>Centro Universitario de la Defensa de Zaragoza, Academia General Militar de Zaragoza, Carretera de Huesca s/n, 50090 Zaragoza, Spain

<sup>b</sup>While on leave from Department of Chemistry, Federal University of Santa Maria, C.P. 5051, 97105-970 Santa Maria - RS, Brazil.

<sup>c</sup>Department of Analytical Chemistry, Aragón Institute of Engineering Research (I3A), University of Zaragoza, Pedro Cerbuna 12, 50009 Zaragoza, Spain.

\* Corresponding author. Tel/Fax:

\* E-mail addresses: maiteam@unizar.es; mresano@unizar.s

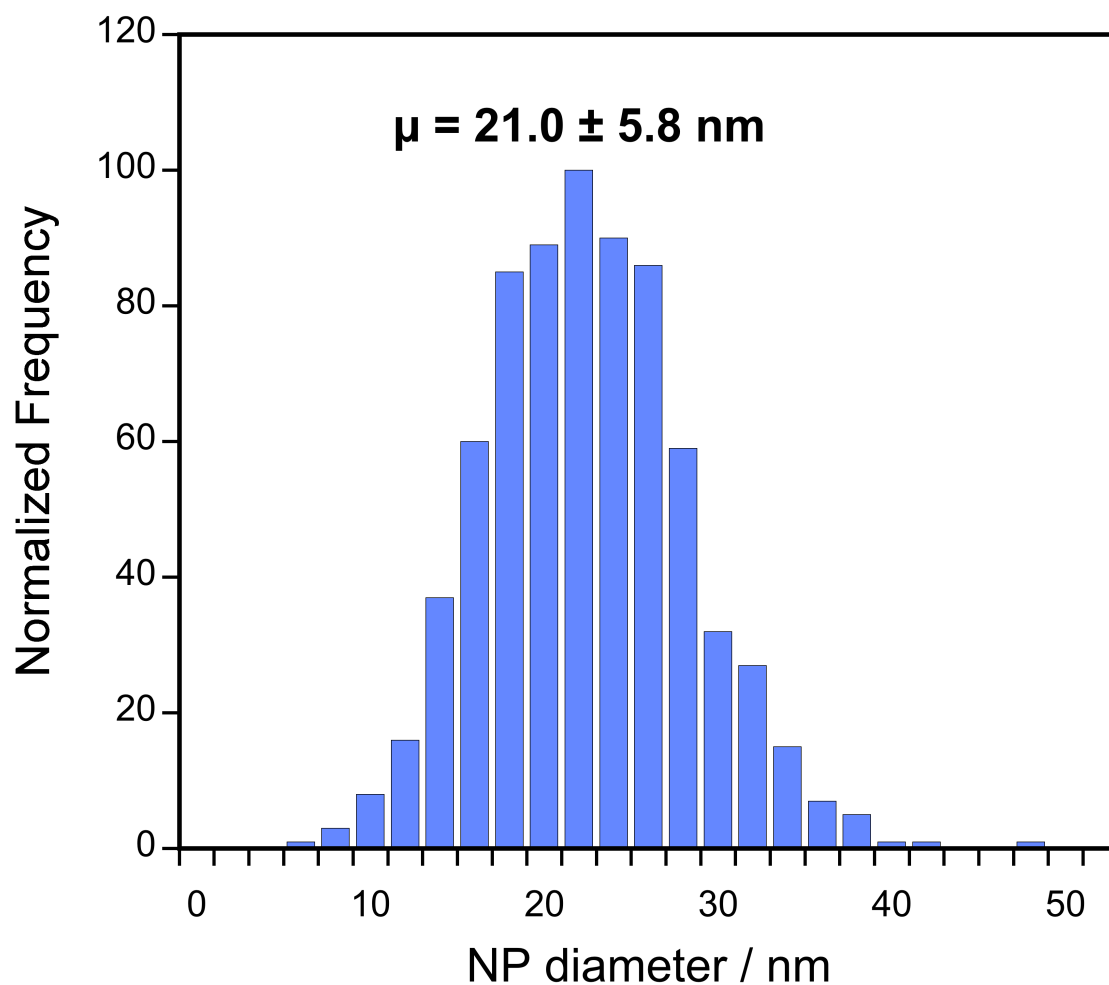

**Figure S1.** Size distribution for the Au nanoparticles (NP) synthesized in the laboratory following the method described in section 2.2, as derived from Transmission Electron Microscopy (TEM) images. A total amount of 758 individual Au NPs were counted for drawing the figure and calculating the mean diameter ( $\mu=21.0 \pm 5.8$  nm).

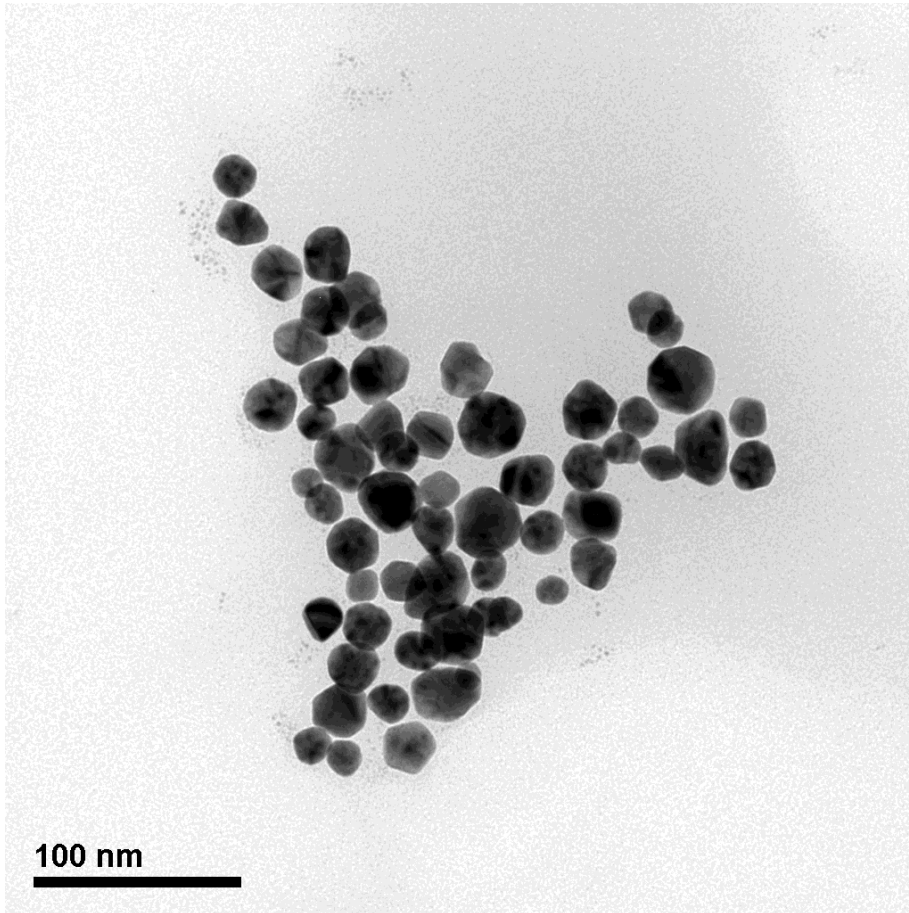

**Figure S2.** TEM image of a set of Au NPs synthesized in the laboratory following the method described in section 2.2.
